# Supplementary material for: Inhibitory effect of tea flower polysaccharides on oxidative stress and microglial oxidative damage in aging mice by regulating gut microbiota
Source: Royal Society of Chemistry journal article supplement (doi:10.1039/d4fo03484h), 2024-01-01
Supplement: d4fo03484h5.pdf [file d4fo03484h5.pdf]

1 **Supplemental Materials**

2 **Figure S1.** The ultraviolet spectrogram of TFPS.

3 **Figure S2.** The molecular weight of TFPS.

4 **Figure S3.** The FT-IR spectra of TFPS.

5 **Figure S4.** The raw images of western blot data.

6
