# Supplementary figures and images for: Inhibitory effect of tea flower polysaccharides on oxidative stress and microglial oxidative damage in aging mice by regulating gut microbiota
Source: Royal Society of Chemistry journal article supplement (doi:10.1039/d4fo03484h), 2024-01-01

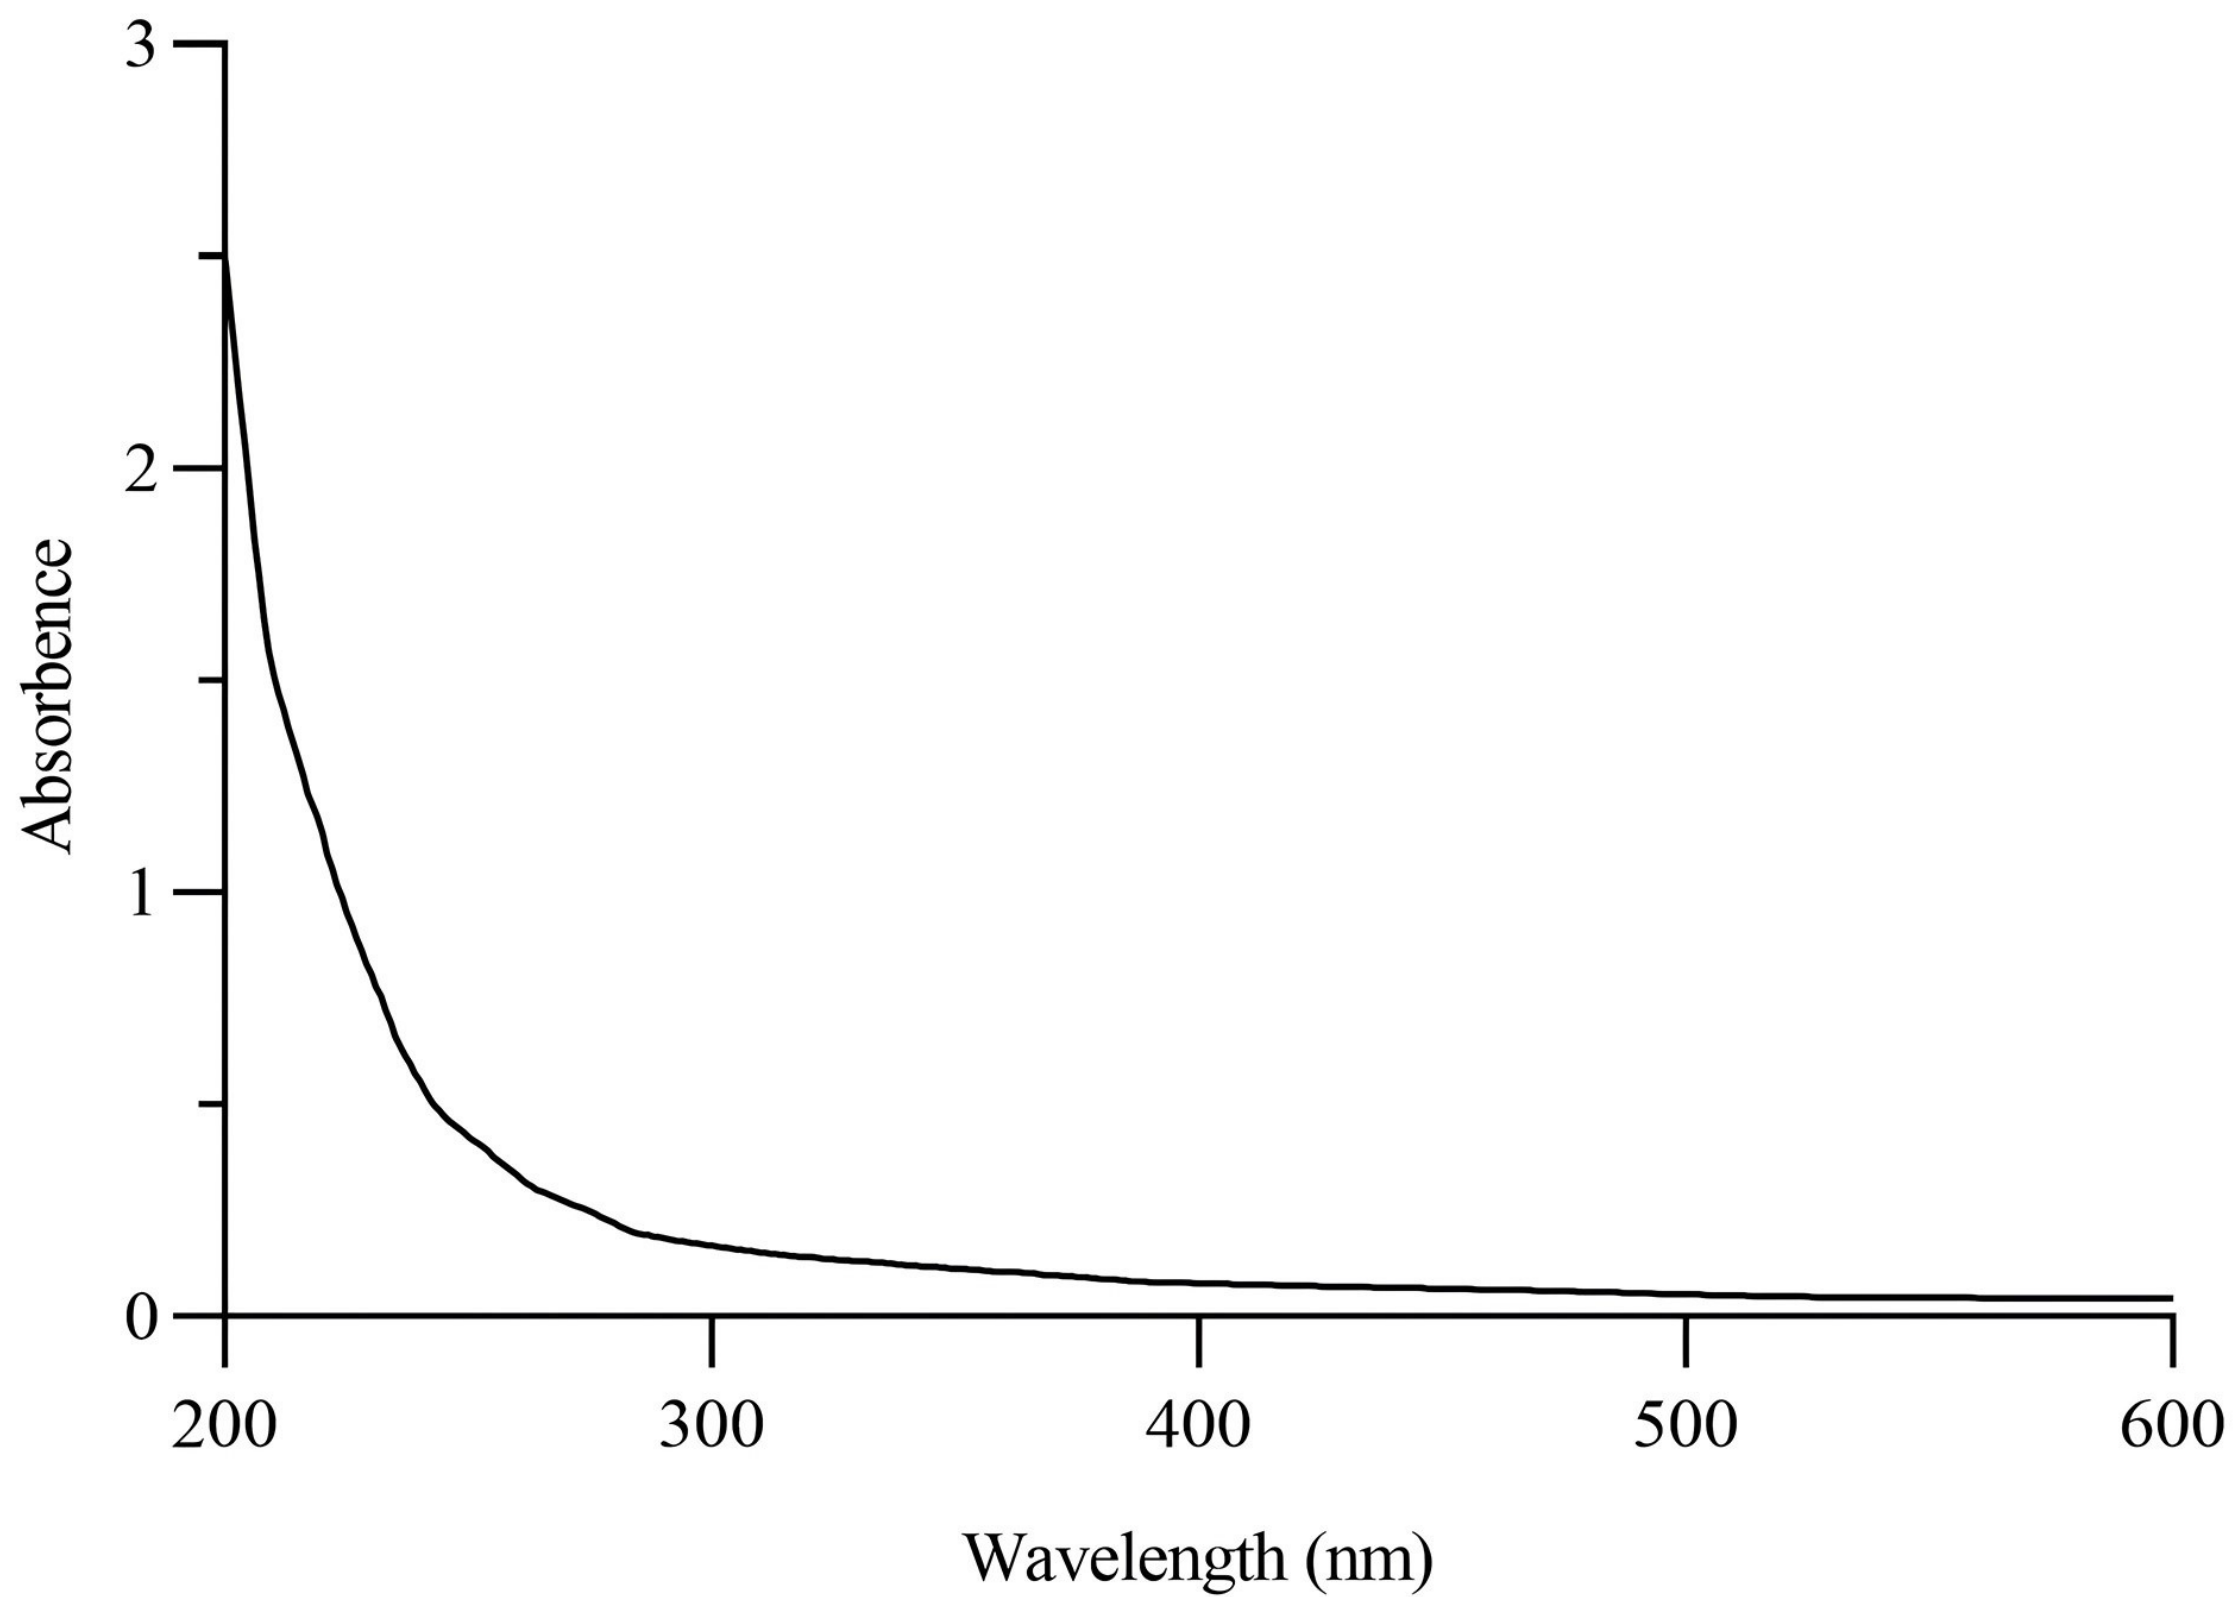

Supplement: d4fo03484h1.pdf [file d4fo03484h1.pdf]

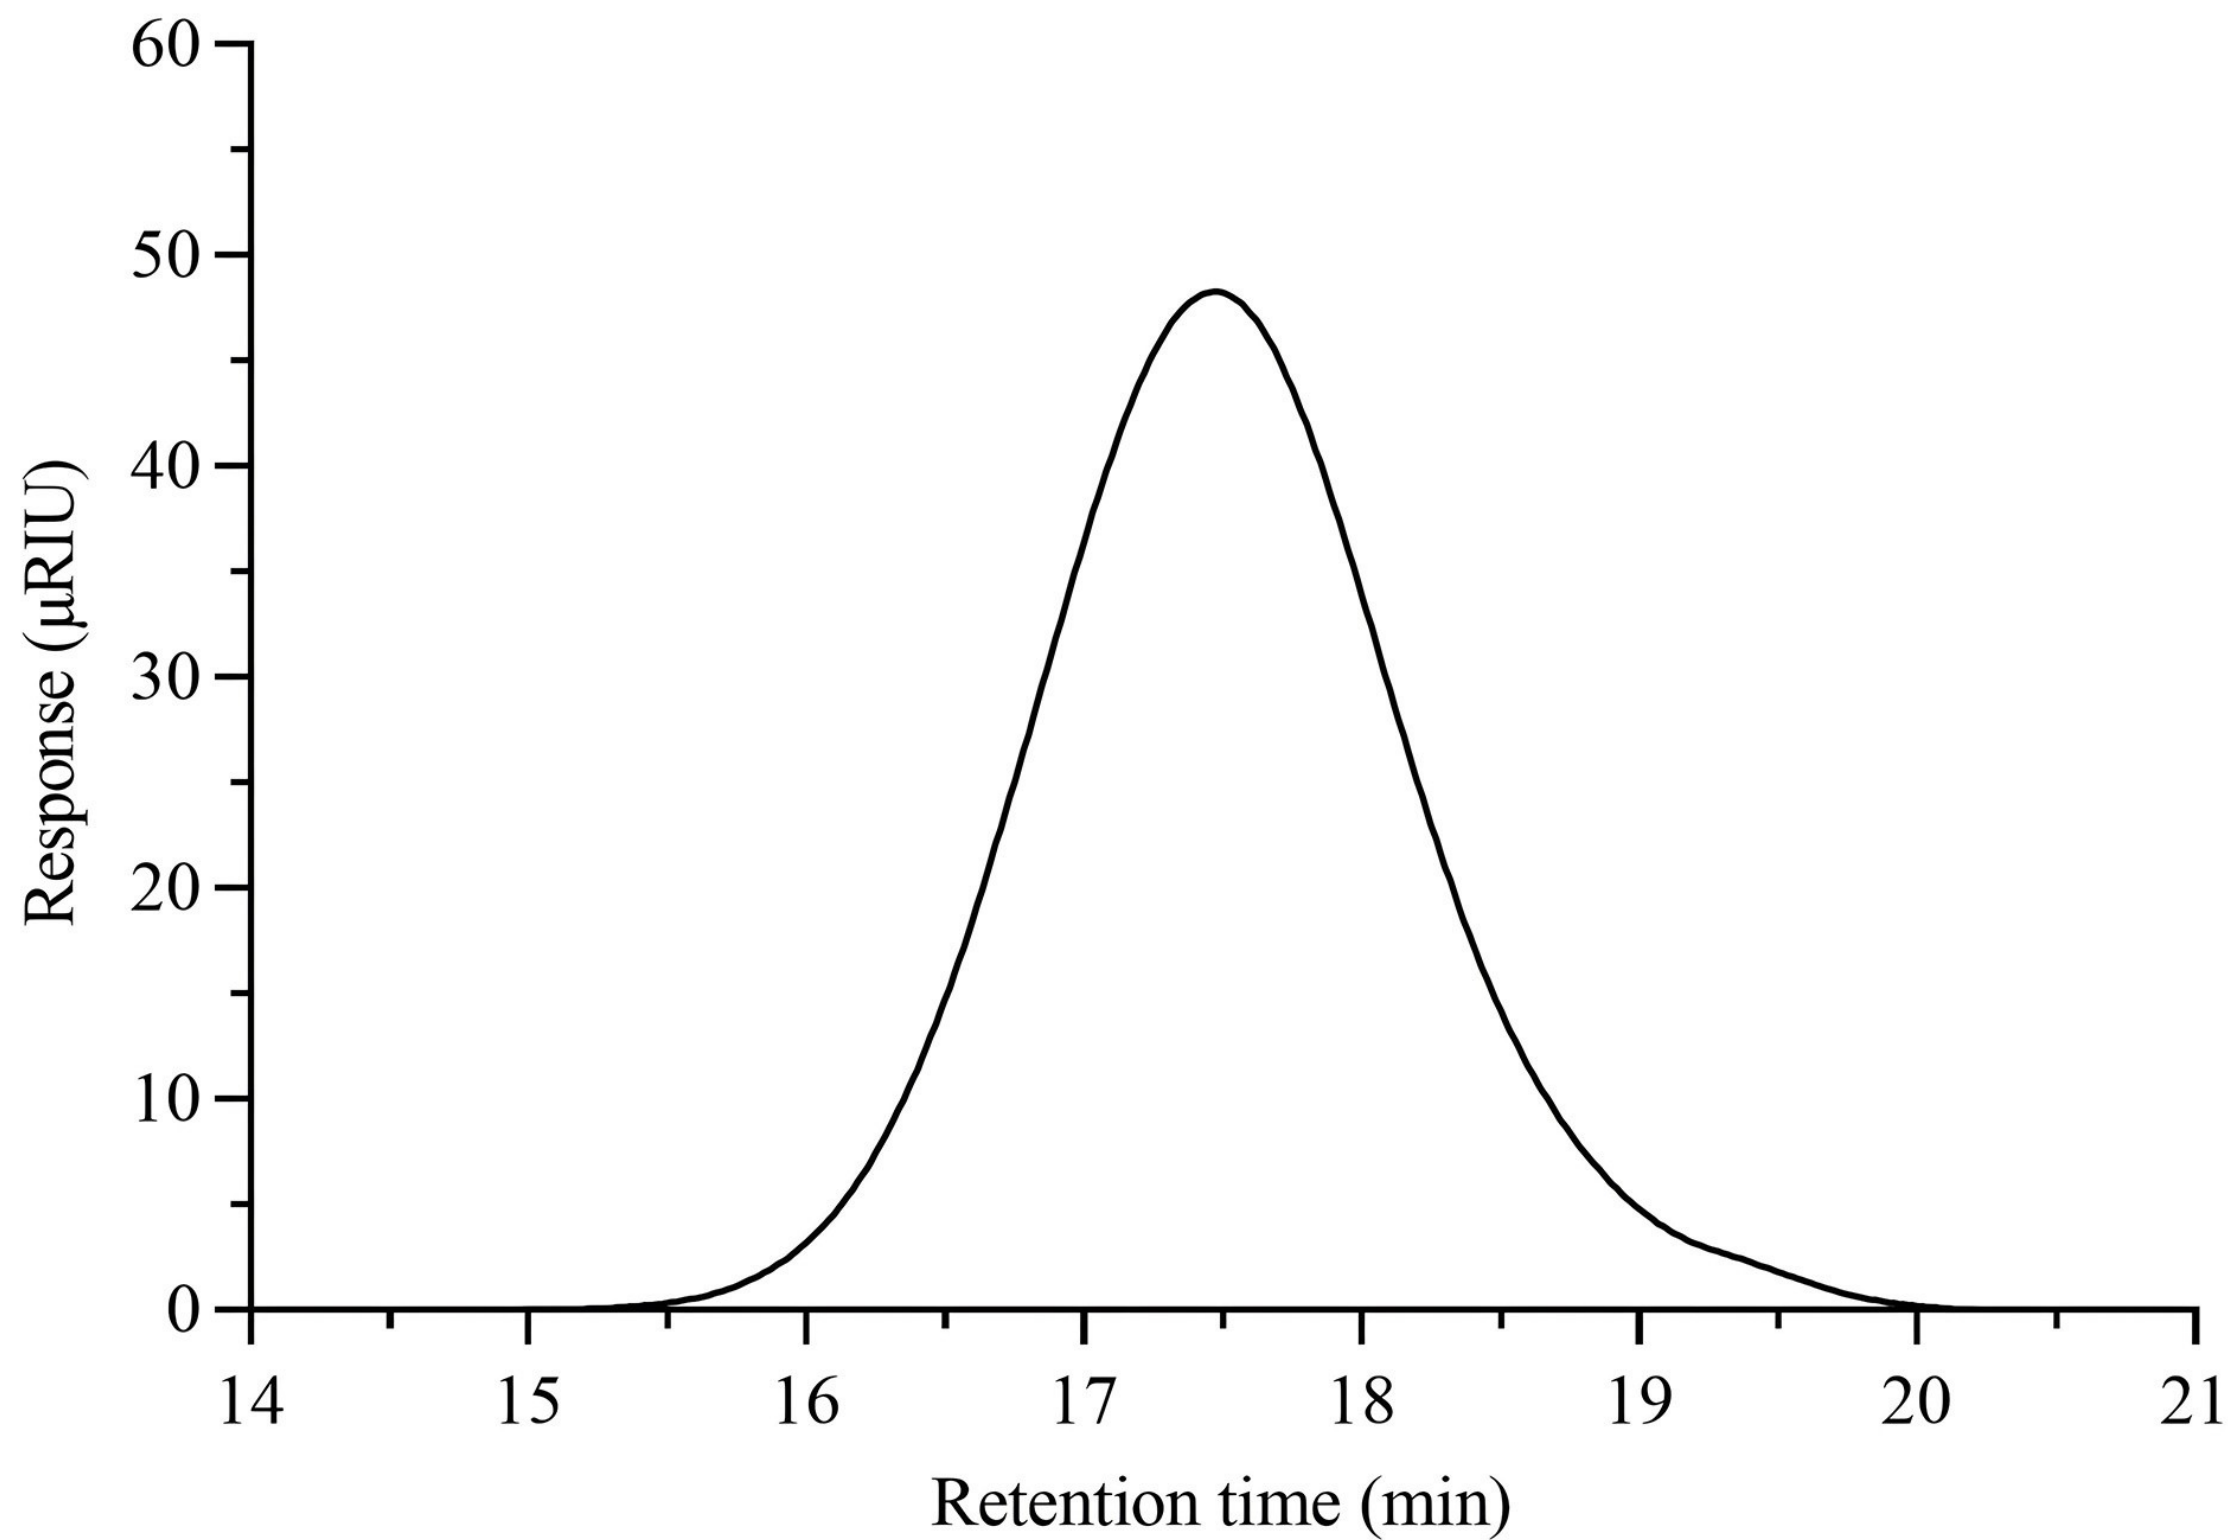

Supplement: d4fo03484h2.pdf [file d4fo03484h2.pdf]

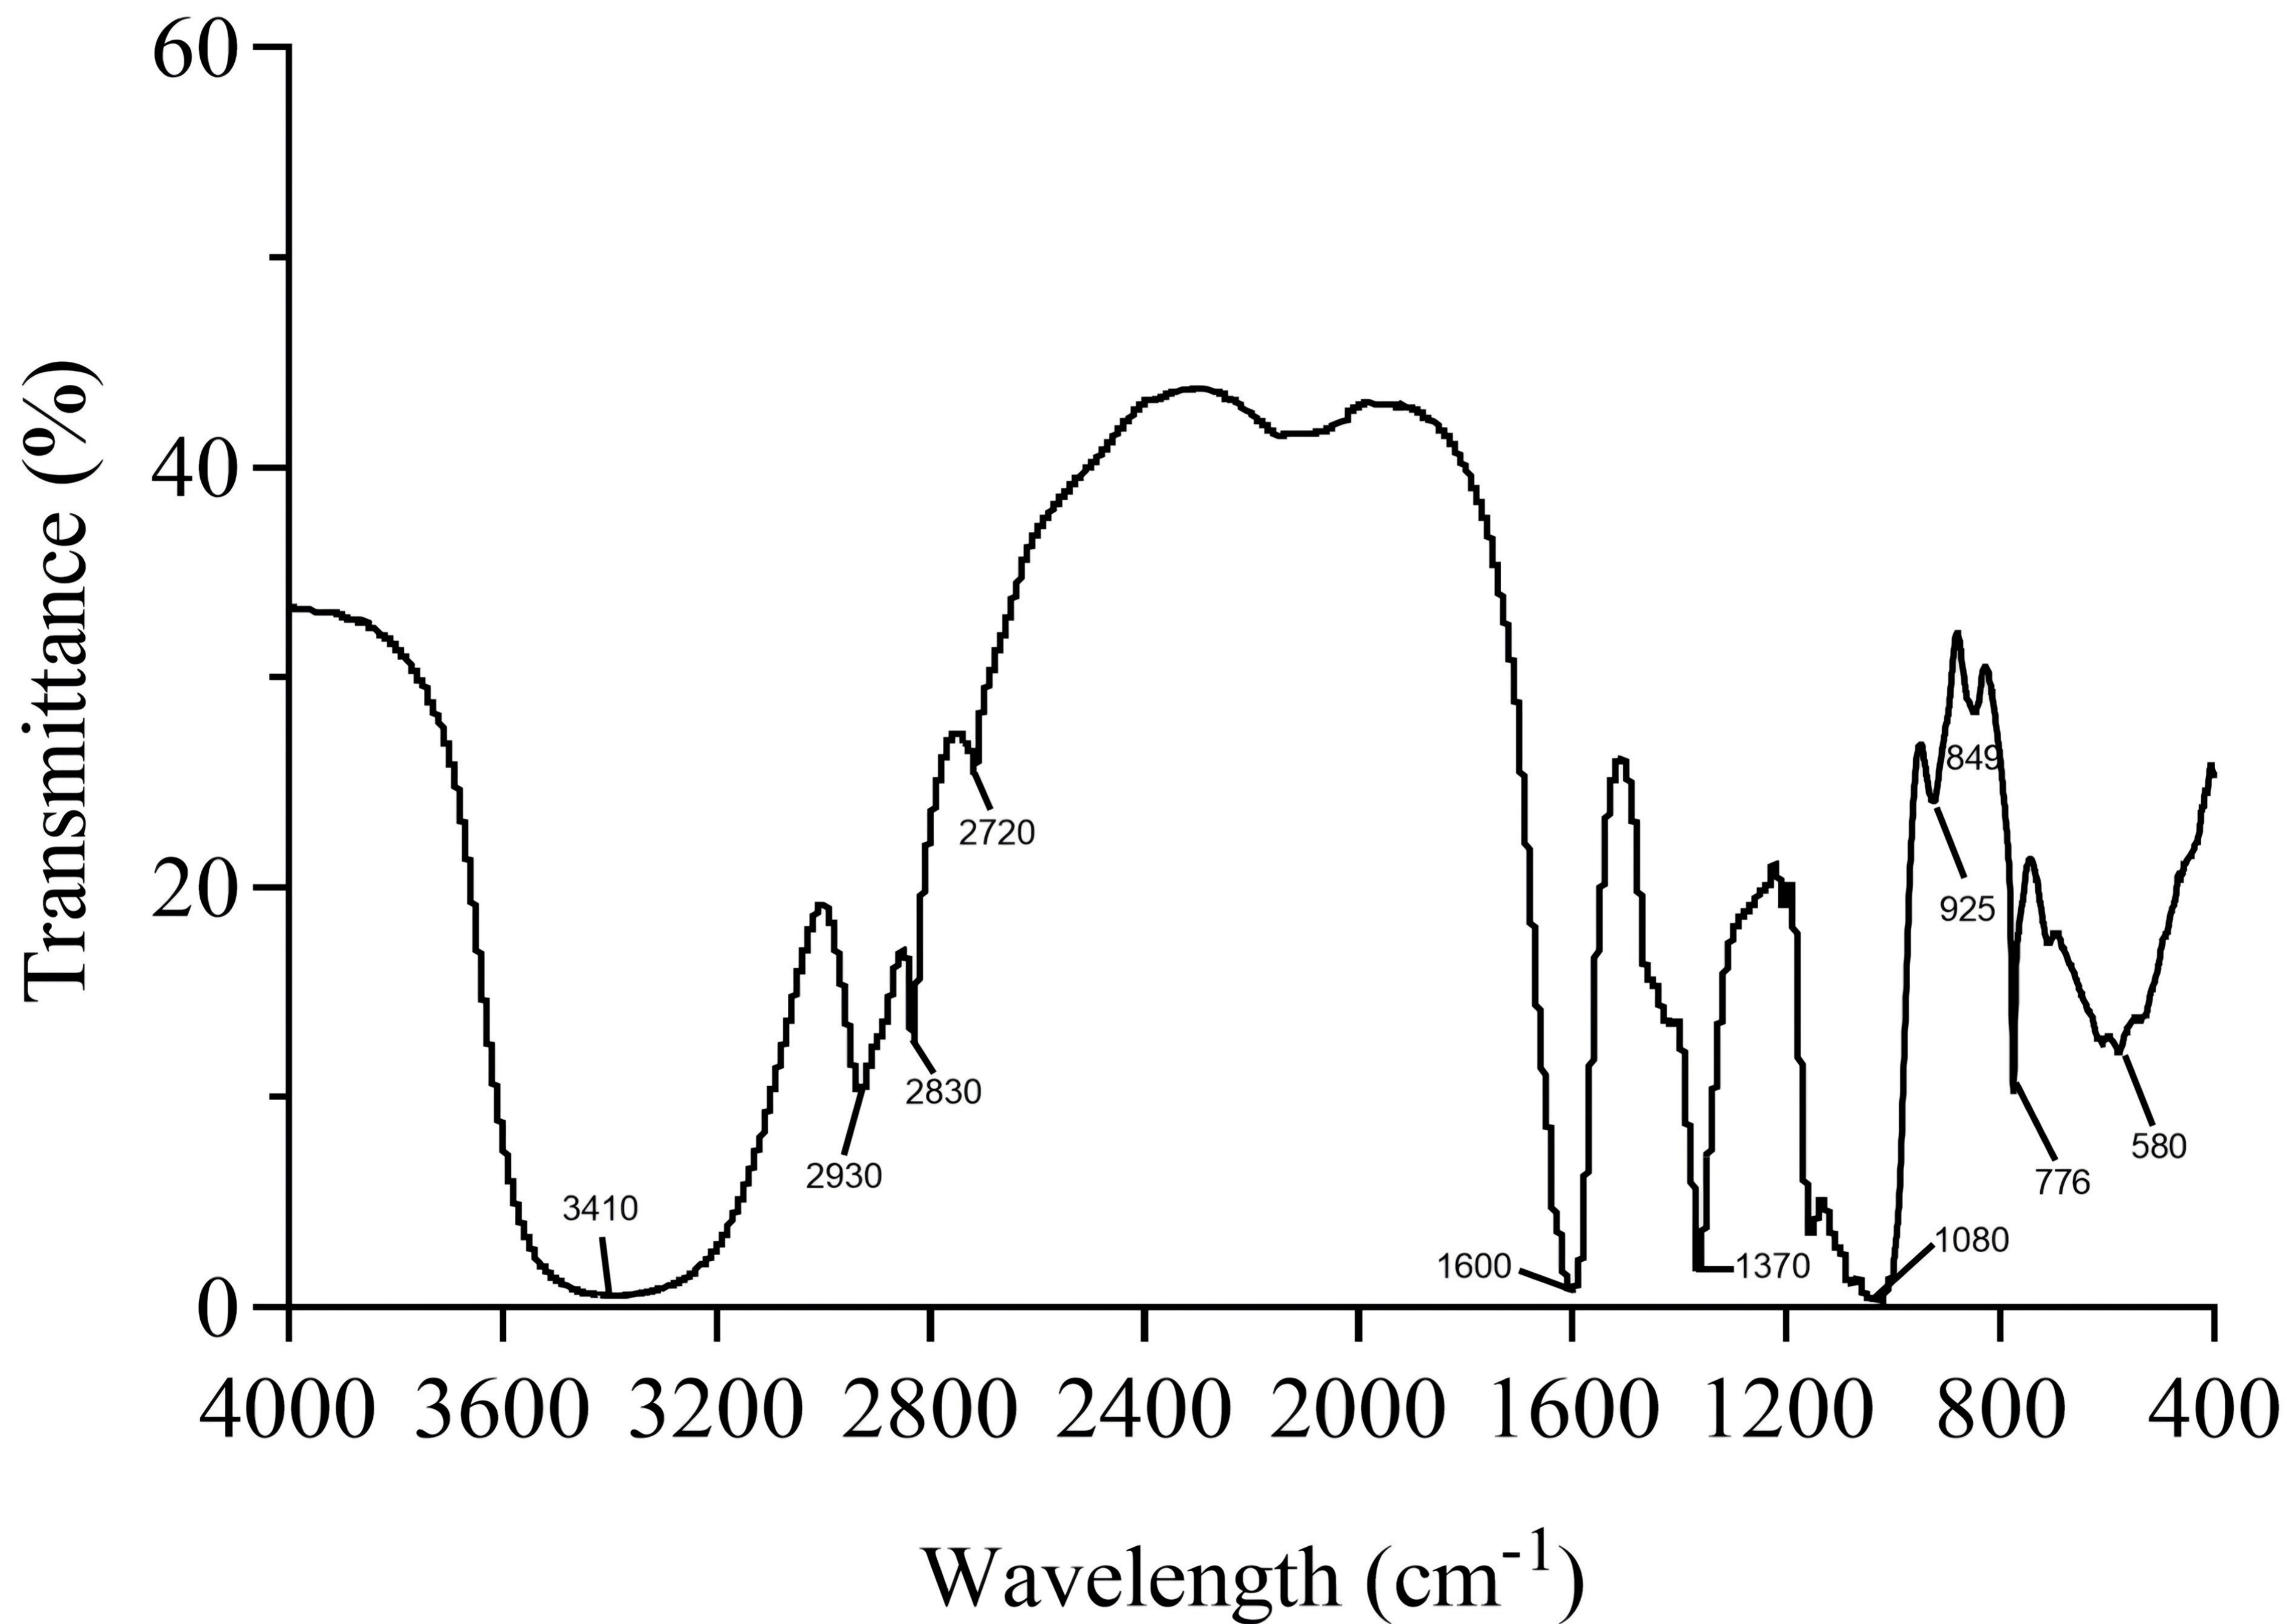

Supplement: d4fo03484h3.pdf [file d4fo03484h3.pdf]

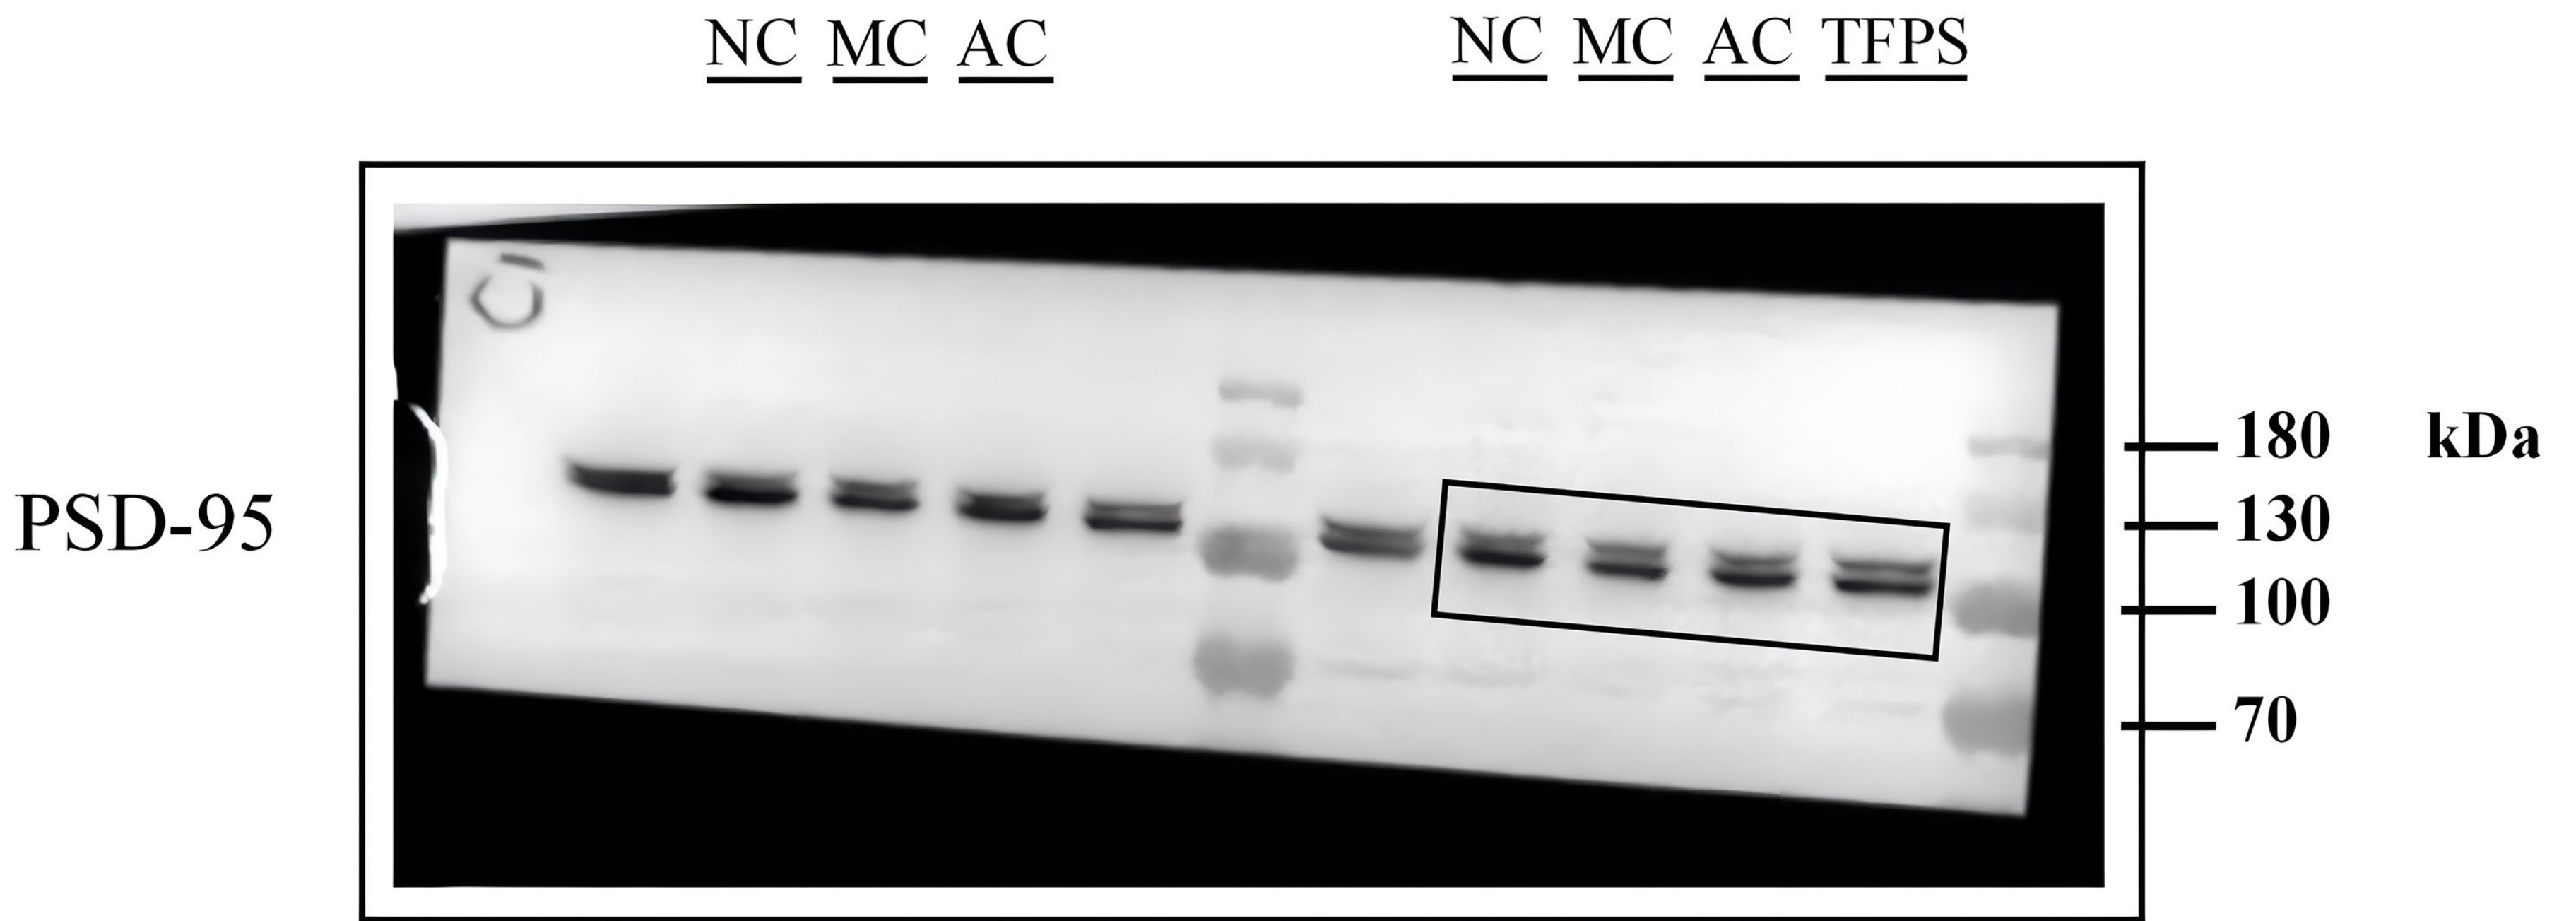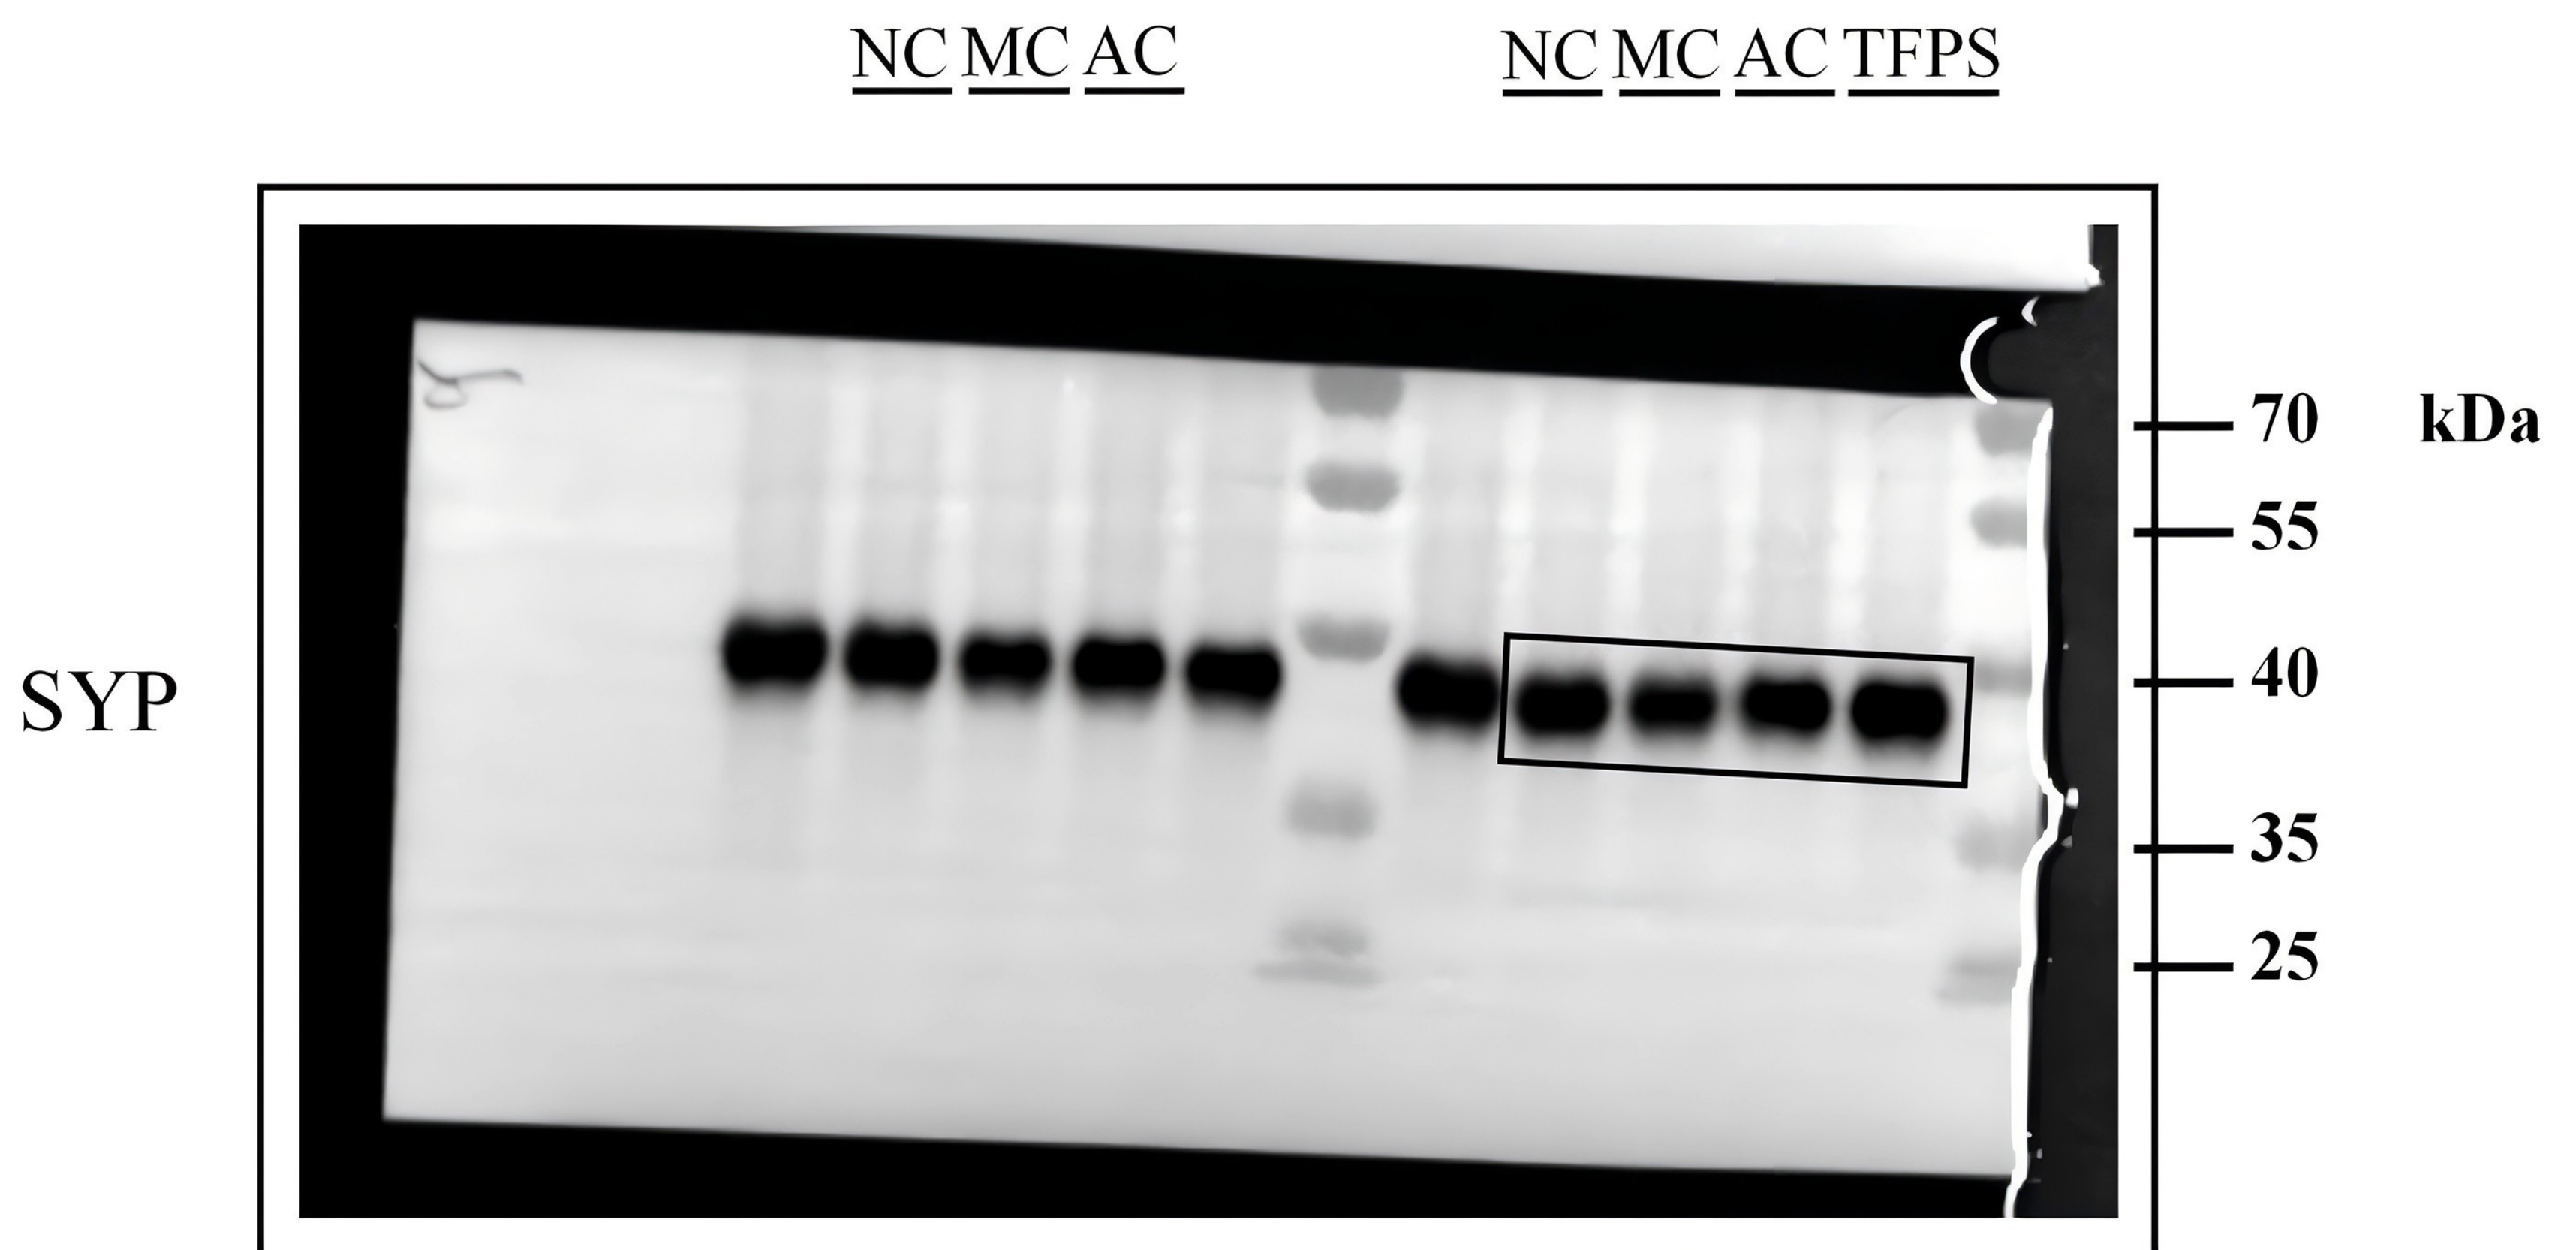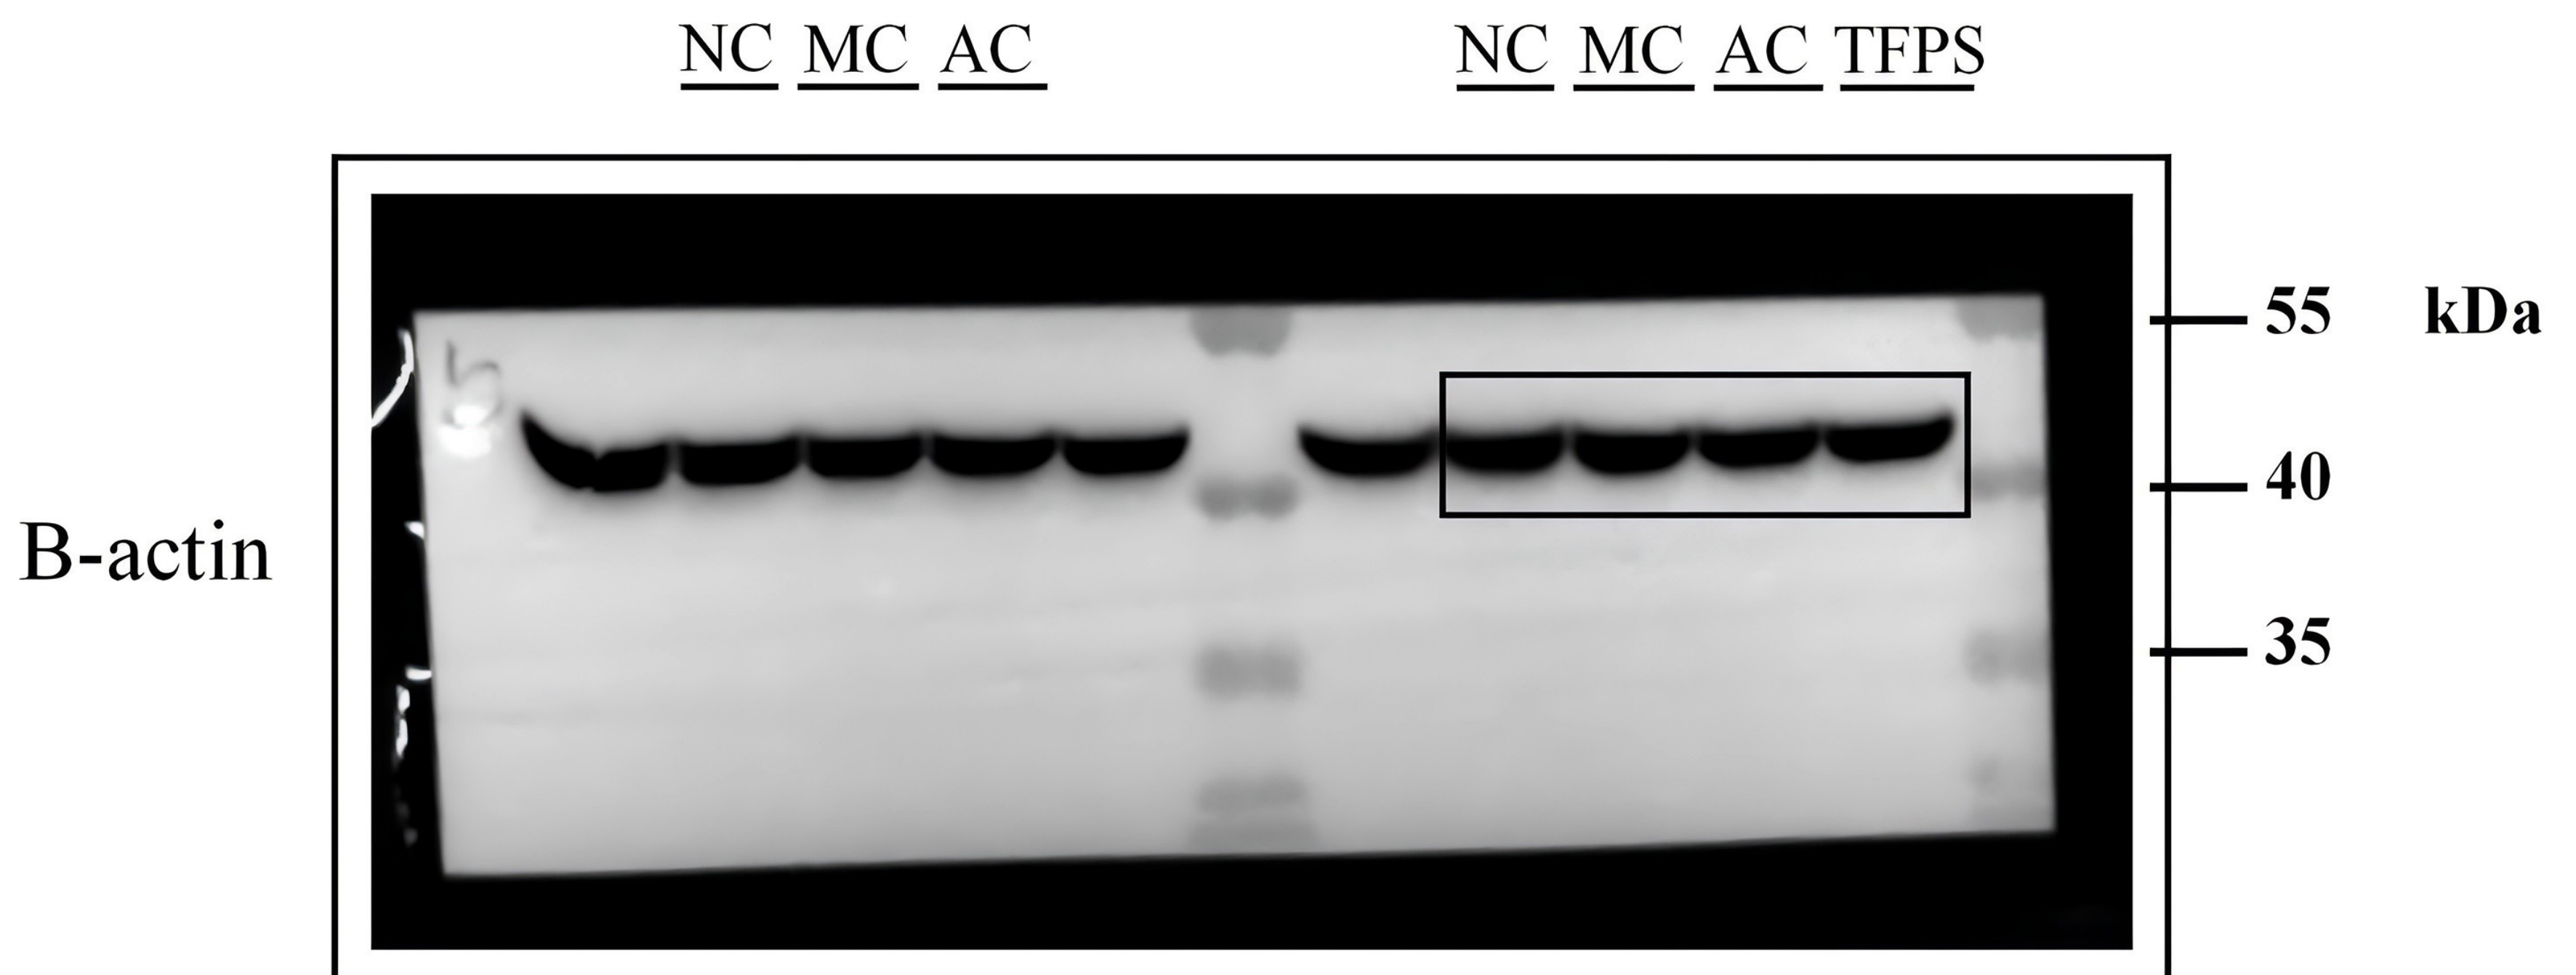

Supplement: d4fo03484h4.pdf [file d4fo03484h4.pdf]
